# Supplementary material for: Colorimetric fluoride detection in dimethyl sulfoxide using a heteroleptic ruthenium(ii) complex with amino and amide groups: X-ray crystallographic and spectroscopic analyses
Source: Royal Society of Chemistry journal article supplement (doi:10.1039/d2ra03593f), 2022-01-01
Supplement: d2ra03593f1.pdf [file d2ra03593f1.pdf]

## **Electronic Supplementary Information**

# **Colorimetric fluoride detection in dimethyl sulfoxide solution using a heteroleptic ruthenium(II) complex with amino and amide groups: X-ray crystallographic and spectroscopic analyses**

Mari Toyama, Tomoki Hasegawa, and Noriharu Nagao

**Table S1.** Hydrogen bonds and related parameters (Å, deg) for  $1 \cdot \text{Cl}_2 \cdot 2.5\text{H}_2\text{O}$  and  $1 \cdot \text{F}_2 \cdot 2\text{EtOH}$ 

| D-H...A                 | D-H  | H...A | D...A | D-H...A |
|-------------------------|------|-------|-------|---------|
| Chloride salt           |      |       |       |         |
| N2-H...Cl2              | 0.86 | 2.35  | 3.21  | 174.9   |
| N5-H...Cl1              | 0.87 | 2.33  | 3.17  | 163.5   |
| N8-H8A...Cl2*           | 0.88 | 2.54  | 3.38  | 158.8   |
| Fluoride salt           |      |       |       |         |
| N2-H...F2               | 0.85 | 1.74  | 2.59  | 171.0   |
| N5-H...F2 <sup>1</sup>  | 0.84 | 1.74  | 2.58  | 171.7   |
| N8-HB...F1              | 0.86 | 1.77  | 2.62  | 173.8   |
| O2-H...F1               | 0.84 | 1.72  | 2.56  | 177.4   |
| O3-H...F1               | 0.91 | 1.72  | 2.57  | 152.4   |
| N8-HA...O2 <sup>2</sup> | 0.86 | 2.08  | 2.89  | 156.4   |

(\*) -x, -y, -z, (1) 1+x, 1.5-y, 1/2+z, (2) -x, 2-y, z

**Table S2.** Sets of <sup>1</sup>H NMR signals on five pyridyl rings of two Hdpa and an H<sub>2</sub>pia ligands.

(a)  $1 \cdot (\text{OTf})_2 \cdot \text{H}_2\text{O}$

| Set | H-3  | H-4  | H-5  | H-6  | Ring assigned |
|-----|------|------|------|------|---------------|
| 1   | 7.00 | 7.65 | 6.89 | 7.54 | C             |
| 2   | 7.17 | 7.73 | 6.73 | 7.62 | B             |
| 3   | 7.30 | 7.86 | 6.81 | 7.60 | A             |
| 4   | 7.30 | 7.85 | 6.82 | 7.81 | D             |
| 5   | 8.19 | 8.06 | 7.81 | 8.94 | E             |

(b)  $1 \cdot \text{Cl}_2 \cdot 2.5\text{H}_2\text{O}$

| Set | H-3  | H-4  | H-5  | H-6  | Ring assigned |
|-----|------|------|------|------|---------------|
| 1   | 7.36 | 7.63 | 6.87 | 7.55 | C             |
| 2   | 7.55 | 7.70 | 6.70 | 7.60 | B             |
| 3   | 7.65 | 7.82 | 6.78 | 7.55 | A             |
| 4   | 7.72 | 7.82 | 6.78 | 7.82 | D             |
| 5   | 8.42 | 8.04 | 7.82 | 8.91 | E             |

**Table S3.** Chemical shifts of  $^1\text{H}$  NMR spectra of  $\mathbf{1}\cdot(\text{OTf})_2\cdot\text{H}_2\text{O}$  and  $\mathbf{1}\cdot\text{Cl}_2\cdot 2.5\text{H}_2\text{O}$  in  $\text{DMSO}-d_6$ 

|                                    | Triflate salt       | Chloride salt       | $\Delta(\delta_{\text{Cl}} - \delta_{(\text{OTf})})$ |
|------------------------------------|---------------------|---------------------|------------------------------------------------------|
| NH(Hdpa)                           | 10.74               | 11.85               | 1.11                                                 |
| NH(Hdpa)                           | 10.62               | 11.52               | 0.90                                                 |
| NH (H <sub>2</sub> pia)            | 9.68                | 9.81                | 0.13                                                 |
| NH' (H <sub>2</sub> pia)           | 9.50                | 9.79                | 0.29                                                 |
| pyridyl-rings of Hdpa              |                     |                     |                                                      |
| H-3a                               | 7.30 (in multiplet) | 7.65                | 0.35                                                 |
| H-3b                               | 7.17                | 7.55 (in multiplet) | 0.38                                                 |
| H-3c                               | 7.00                | 7.36                | 0.36                                                 |
| H-3d                               | 7.30 (in multiplet) | 7.72                | 0.42                                                 |
| -----                              |                     |                     |                                                      |
| H-4a                               | 7.86                | 7.82 (in multiplet) | -0.04                                                |
| H-4b                               | 7.73                | 7.70                | -0.03                                                |
| H-4c                               | 7.65                | 7.63                | -0.02                                                |
| H-4d                               | 7.85                | 7.82 (in multiplet) | -0.03                                                |
| -----                              |                     |                     |                                                      |
| H-5a                               | 6.81                | 6.78 (in multiplet) | -0.03                                                |
| H-5b                               | 6.73                | 6.70                | -0.03                                                |
| H-5c                               | 6.89                | 6.87                | -0.02                                                |
| H-5d                               | 6.82                | 6.78 (in multiplet) | -0.04                                                |
| -----                              |                     |                     |                                                      |
| H-6a                               | 7.60                | 7.55 (in multiplet) | -0.05                                                |
| H-6b                               | 7.62                | 7.60                | -0.02                                                |
| H-6c                               | 7.54                | 7.55 (in multiplet) | 0.01                                                 |
| H-6d                               | 7.81 (in multiplet) | 7.82 (in multiplet) | 0.01                                                 |
| pyridyl-ring of H <sub>2</sub> pia |                     |                     |                                                      |
| H-3e                               | 8.19                | 8.42                | 0.23                                                 |
| H-4e                               | 8.06                | 8.04                | -0.02                                                |
| H-5e                               | 7.81                | 7.82 (in multiplet) | -0.01                                                |
| H-6e (in multiplet)                | 8.94 (in multiplet) | 8.91                | -0.03                                                |

**Table S4.** DFT optimized coordinates (Å) of  $\mathbf{1}^{2+}$  calculated using Spartan'20 at the B3LYP/LANL2DZ/6-31G\* level in vacuum. The final energy is  $-1612.05570597404$  Hartree

| ATOM | X/Å          | Y/Å          | Z/Å          |
|------|--------------|--------------|--------------|
| 1 Ru | -0.055910347 | -0.034334723 | -0.166446773 |
| 2 N  | -0.502667242 | 0.067347745  | 1.892728071  |
| 3 C  | -1.000506676 | 0.079313101  | 4.653713621  |
| 4 C  | -1.091998587 | -0.987291534 | 2.517127634  |
| 5 C  | -0.221453194 | 1.158117334  | 2.640704833  |
| 6 C  | -0.443687876 | 1.182332792  | 4.028538013  |
| 7 C  | -1.348690834 | -1.029364524 | 3.874626212  |
| 8 H  | -1.344871224 | -1.819430677 | 1.874196805  |
| 9 H  | -0.198879994 | 2.075675534  | 4.595403281  |
| 10 H | -1.811360936 | -1.908093407 | 4.309499334  |
| 11 H | -1.18200079  | 0.090725325  | 5.723675256  |
| 12 N | -0.195947538 | 2.083938394  | -0.254016536 |
| 13 C | -0.184458035 | 4.866961536  | -0.519008356 |
| 14 C | 0.065015895  | 2.871052604  | 0.806803804  |
| 15 C | -0.491083742 | 2.681832395  | -1.436664376 |
| 16 C | -0.494211015 | 4.053072664  | -1.614692264 |
| 17 C | 0.089842468  | 4.272217195  | 0.70182971   |
| 18 H | -0.715064391 | 2.003785295  | -2.250948847 |
| 19 H | -0.734081425 | 4.473395342  | -2.584839527 |
| 20 H | 0.30254193   | 4.876031765  | 1.578942455  |
| 21 H | -0.175627362 | 5.948271834  | -0.613030711 |
| 22 N | -2.123235558 | -0.263129381 | -0.602708999 |
| 23 C | -4.77098669  | -0.331294293 | -1.512145798 |
| 24 C | -3.035965288 | 0.659377279  | -0.203770791 |
| 25 C | -2.548540203 | -1.261080858 | -1.405356845 |
| 26 C | -3.865982563 | -1.306501066 | -1.894431267 |
| 27 C | -4.351340391 | 0.668577942  | -0.627599141 |
| 28 H | -2.662911176 | 1.419469449  | 0.470143456  |
| 29 H | -4.168642815 | -2.119145324 | -2.547992096 |
| 30 H | -5.028060638 | 1.439871533  | -0.277814013 |
| 31 H | -5.792322529 | -0.360651765 | -1.878260365 |

**Table S4.** (continued)

| ATOM | X/Å          | Y/Å          | Z/Å          |
|------|--------------|--------------|--------------|
| 32 N | 0.087197615  | -2.166920315 | -0.19890714  |
| 33 C | 0.586341073  | -4.896693488 | -0.564812438 |
| 34 C | -0.651807428 | -2.888558809 | -1.066535389 |
| 35 C | 1.031795438  | -2.819579637 | 0.525886165  |
| 36 C | 1.316855653  | -4.16349655  | 0.37946618   |
| 37 C | -0.408672265 | -4.258054416 | -1.283413313 |
| 38 H | 1.572002542  | -2.20775147  | 1.238523504  |
| 39 H | 2.089363954  | -4.62473579  | 0.984290603  |
| 40 H | -1.019291739 | -4.805581417 | -1.995336425 |
| 41 H | 0.778149035  | -5.953883407 | -0.718710375 |
| 42 N | 0.348809553  | 2.291684105  | 2.048980317  |
| 43 H | 0.602982339  | 2.987850032  | 2.739364941  |
| 44 N | -1.67494234  | -2.280767756 | -1.789622919 |
| 45 H | -2.08736271  | -2.903500323 | -2.472897118 |
| 46 N | 2.073614851  | 0.1597171    | -0.101120012 |
| 47 C | 4.856077307  | 0.439638683  | -0.304641025 |
| 48 C | 2.841806755  | 0.291865319  | 0.993629528  |
| 49 C | 2.688644289  | 0.154757252  | -1.31765601  |
| 50 C | 4.069682931  | 0.295638063  | -1.447477505 |
| 51 C | 4.227240591  | 0.433334486  | 0.937572146  |
| 52 H | 2.31830042   | 0.284279046  | 1.941552505  |
| 53 H | 4.54406505   | 0.297024143  | -2.422913879 |
| 54 H | 4.793765206  | 0.537508609  | 1.856964886  |
| 55 H | 5.932136106  | 0.552241113  | -0.387241697 |
| 56 C | 1.743791521  | -0.010154947 | -2.46224914  |
| 57 O | 0.51304156   | -0.103925226 | -2.232366711 |
| 58 N | 2.200453024  | -0.051605764 | -3.7196745   |
| 59 H | 3.176462497  | 0.018302024  | -3.965460081 |
| 60 H | 1.532585932  | -0.159680163 | -4.47340088  |

**Table S5.** Selected bond lengths (Å), angles (deg), and dihedral angles (deg) for **1**·Cl<sub>2</sub>·2.5H<sub>2</sub>O (that is, **1**<sup>2+</sup>(exp.), **1**<sup>2+</sup>(calc.), **1**·F<sub>2</sub>·2EtOH(exp.), and **1**·F<sub>3</sub><sup>-</sup>(calc.)

|                   | <b>1</b> <sup>2+</sup> (exp.) | <b>1</b> <sup>2+</sup> (calc.) | <b>1</b> ·F <sub>2</sub> ·2EtOH(exp.) | <b>1</b> ·F <sub>3</sub> <sup>-</sup> (calc.) |
|-------------------|-------------------------------|--------------------------------|---------------------------------------|-----------------------------------------------|
| Ru1-N1            | 2.078(6)                      | 2.137                          | 2.0861(15)                            | 2.134                                         |
| Ru1-N3            | 2.062(6)                      | 2.125                          | 2.0705(15)                            | 2.118                                         |
| Ru1-N4            | 2.049(5)                      | 2.109                          | 2.0517(14)                            | 2.111                                         |
| Ru1-N6            | 2.073(5)                      | 2.125                          | 2.0693(15)                            | 2.116                                         |
| Ru1-N7            | 2.066(6)                      | 2.139                          | 2.0621(15)                            | 2.112                                         |
| Ru1-O1            | 2.099(5)                      | 2.144                          | 2.1058(12)                            | 2.134                                         |
| O1-C26            | 1.268(9)                      | 1.256                          | 1.269(2)                              | 1.289                                         |
| C26-N8            | 1.324(10)                     | 1.338                          | 1.304(2)                              | 1.307                                         |
| C21-C26           | 1.485(10)                     | 1.493                          | 1.496(2)                              | 1.509                                         |
| N1-Ru1-N3         | 87.5(2)                       | 87.42                          | 87.71(6)                              | 88.41                                         |
| N4-Ru1-N6         | 89.4(2)                       | 88.75                          | 90.77(6)                              | 89.75                                         |
| N7-Ru1-O1         | 78.4(2)                       | 76.61                          | 78.16(5)                              | 77.64                                         |
| C1-N2-C6          | 128.0(6)                      | 129.48                         | 127.97(15)                            | 129.94                                        |
| C11-N5-C16        | 127.9(5)                      | 128.86                         | 131.75(16)                            | 130.44                                        |
| O1-C26-N8         | 120.9(7)                      | 120.27                         | 122.10(17)                            | 125.26                                        |
| O1-C26-C21        | 118.5(6)                      | 119.22                         | 117.63(16)                            | 116.55                                        |
| C21-C26-N8        | 120.5(7)                      | 120.51                         | 120.22(17)                            | 118.19                                        |
| Ru1-N1-C2-N2      | 10.1(9)                       | 10.94                          | -20.1(2)                              | -15.80                                        |
| Ru1-N3-C6-N2      | -14.0(8)                      | -10.24                         | 5.4(2)                                | 12.67                                         |
| Ru1-N4-C11-N5     | -6.0(8)                       | -2.03                          | 5.2(2)                                | 6.65                                          |
| Ru1-N6-C16-N5     | 4.1(9)                        | 4.69                           | -10.7(2)                              | -8.55                                         |
| Plane(1)-plane(2) | 34.8                          | 31.11 <sup>1)</sup>            | 31.7                                  | 20.03 <sup>1)</sup>                           |
| Plane(3)-Plane(4) | 30.0                          | 32.36 <sup>2)</sup>            | 15.8                                  | 16.15 <sup>2)</sup>                           |
| N2-F1             | -                             | -                              | 2.585                                 | 2.540                                         |
| N5-F1             | -                             | -                              | 2.576                                 | 2.529                                         |
| N7-F2             | -                             | -                              | 2.694                                 | 2.545                                         |

Plane(1) = N1, C1, C2, C3, C4, C5, Plane(2) = N3, C6, C7, C8, C9, C10,

Plane(3) = N4, C11, C12, C13, C14, C15, Plane(4) = N6, C16, C17, C18, C19, C20,

<sup>1)</sup> Plane(1) = N1, C2, C4, Plane(2) = N3, C7, C9,

<sup>2)</sup> Plane(3) = N4, C12, C14, Plane(4) = N6, C17, C19

**Table S6.** DFT optimized coordinates (Å) of  $\mathbf{1}\cdot\text{F}_3^-$  calculated using Spartan'20 at the B3LYP/LANL2DZ/6-31G\* level in vacuum. The final energy is  $-1912.10923977040$  Hartree

| ATOM | X/Å         | Y/Å          | Z/Å          |
|------|-------------|--------------|--------------|
| 1 Ru | 0.124993832 | -0.116087638 | -0.038617873 |
| 2 N  | 0.549899704 | 1.950066033  | 0.040950805  |
| 3 C  | 0.928267983 | 4.732429172  | -0.030446637 |
| 4 C  | 0.937204938 | 2.593385413  | -1.09053715  |
| 5 C  | 0.411739026 | 2.684778285  | 1.191685463  |
| 6 C  | 0.572145654 | 4.104323177  | 1.139525519  |
| 7 C  | 1.136719523 | 3.956086127  | -1.184265109 |
| 8 H  | 1.072477977 | 1.951157251  | -1.951501015 |
| 9 H  | 0.4234694   | 4.646620192  | 2.066826598  |
| 10 H | 1.440849158 | 4.394374686  | -2.129189224 |
| 11 H | 1.059959086 | 5.811891188  | -0.053234733 |
| 12 N | 0.215149039 | -0.206413903 | 2.073320271  |
| 13 C | 0.068852946 | -0.50555998  | 4.85262846   |
| 14 C | 0.118875438 | 0.902547512  | 2.865189873  |
| 15 C | 0.276014287 | -1.428187811 | 2.658936493  |
| 16 C | 0.212289196 | -1.632130014 | 4.023985605  |
| 17 C | 0.021586765 | 0.745562792  | 4.280918015  |
| 18 H | 0.360690439 | -2.255193306 | 1.96343357   |
| 19 H | 0.263086714 | -2.639725445 | 4.423325607  |
| 20 H | -0.06938351 | 1.650964746  | 4.870784099  |
| 21 H | 0.003400373 | -0.61418274  | 5.932952943  |
| 22 N | 2.190269471 | -0.542227283 | -0.233262995 |
| 23 C | 4.850178747 | -1.427774443 | -0.230689999 |
| 24 C | 3.037501175 | -0.252721191 | 0.784734904  |
| 25 C | 2.676575828 | -1.22534374  | -1.314044935 |
| 26 C | 4.021742008 | -1.704986702 | -1.292431462 |
| 27 C | 4.355808317 | -0.660220138 | 0.838707026  |
| 28 H | 2.603464281 | 0.322645498  | 1.59324667   |
| 29 H | 4.354562051 | -2.264142127 | -2.159983202 |
| 30 H | 4.970826388 | -0.394021186 | 1.692180588  |
| 31 H | 5.87714324  | -1.786439208 | -0.230540338 |

**Table S6.** (continued)

| ATOM | X/Å          | Y/Å          | Z/Å          |
|------|--------------|--------------|--------------|
| 32 N | -0.030040438 | -0.190052006 | -2.166138933 |
| 33 C | -0.583197393 | -0.684801557 | -4.870893199 |
| 34 C | 0.82857133   | -0.961519923 | -2.901874907 |
| 35 C | -1.102408632 | 0.35748262   | -2.789512115 |
| 36 C | -1.423758584 | 0.154618353  | -4.116044095 |
| 37 C | 0.526041225  | -1.232737262 | -4.273157057 |
| 38 H | -1.725557903 | 0.983642666  | -2.161458078 |
| 39 H | -2.305092179 | 0.623924103  | -4.541039879 |
| 40 H | 1.225613339  | -1.861959931 | -4.812342353 |
| 41 H | -0.797522613 | -0.889816375 | -5.917368804 |
| 42 N | 0.122565973  | 2.183502472  | 2.416565014  |
| 43 H | -0.07756618  | 3.241435748  | 3.51168612   |
| 44 N | 1.991527731  | -1.481778231 | -2.453575392 |
| 45 H | 2.734073633  | -2.348437734 | -3.46179897  |
| 46 N | -1.972654729 | -0.0126844   | 0.188810772  |
| 47 C | -4.739763118 | -0.156480948 | 0.506827088  |
| 48 C | -2.699718531 | 1.097601239  | 0.419594605  |
| 49 C | -2.611708414 | -1.210988782 | 0.124288784  |
| 50 C | -3.997797812 | -1.310951331 | 0.272833989  |
| 51 C | -4.078875154 | 1.069815819  | 0.585994269  |
| 52 H | -2.140392484 | 2.024623327  | 0.46738062   |
| 53 H | -4.468748364 | -2.286342237 | 0.200182453  |
| 54 H | -4.614251776 | 1.995806635  | 0.773327572  |
| 55 H | -5.818040486 | -0.216178636 | 0.628159673  |
| 56 C | -1.71394006  | -2.402453726 | -0.099699999 |
| 57 O | -0.447204646 | -2.169842367 | -0.138666416 |
| 58 N | -2.269297907 | -3.579221652 | -0.22487545  |
| 59 H | -3.735852554 | -4.059127154 | -0.149877014 |
| 60 H | -1.537059367 | -4.27385439  | -0.378115569 |
| 61 F | -4.71106314  | -4.281087838 | -0.069184388 |
| 62 F | -0.157568045 | 3.936434191  | 4.23318663   |
| 63 F | 3.264327803  | -2.850045912 | -4.157802807 |



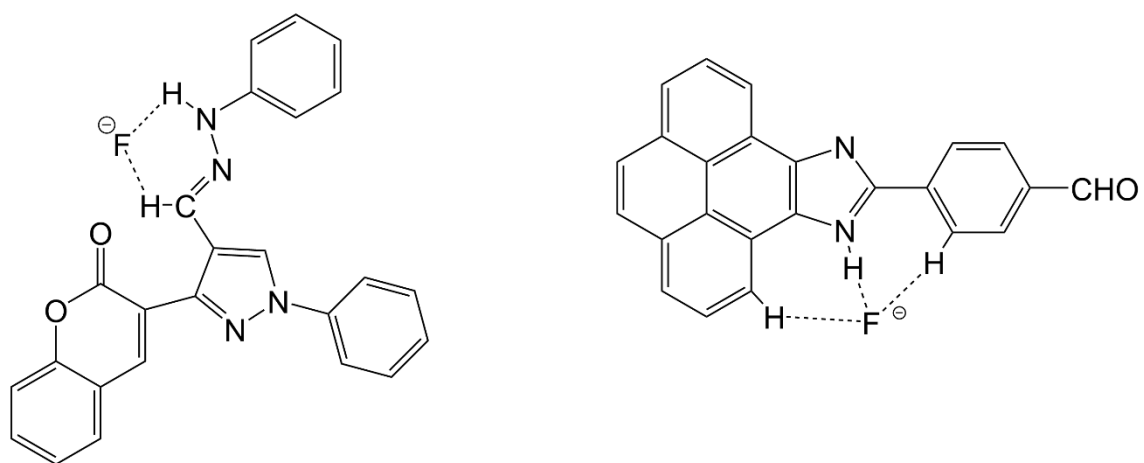

**Fig. S1.** Proposal structures of anion-receptors with an  $F^-$  anion. Ref. 16, 17.

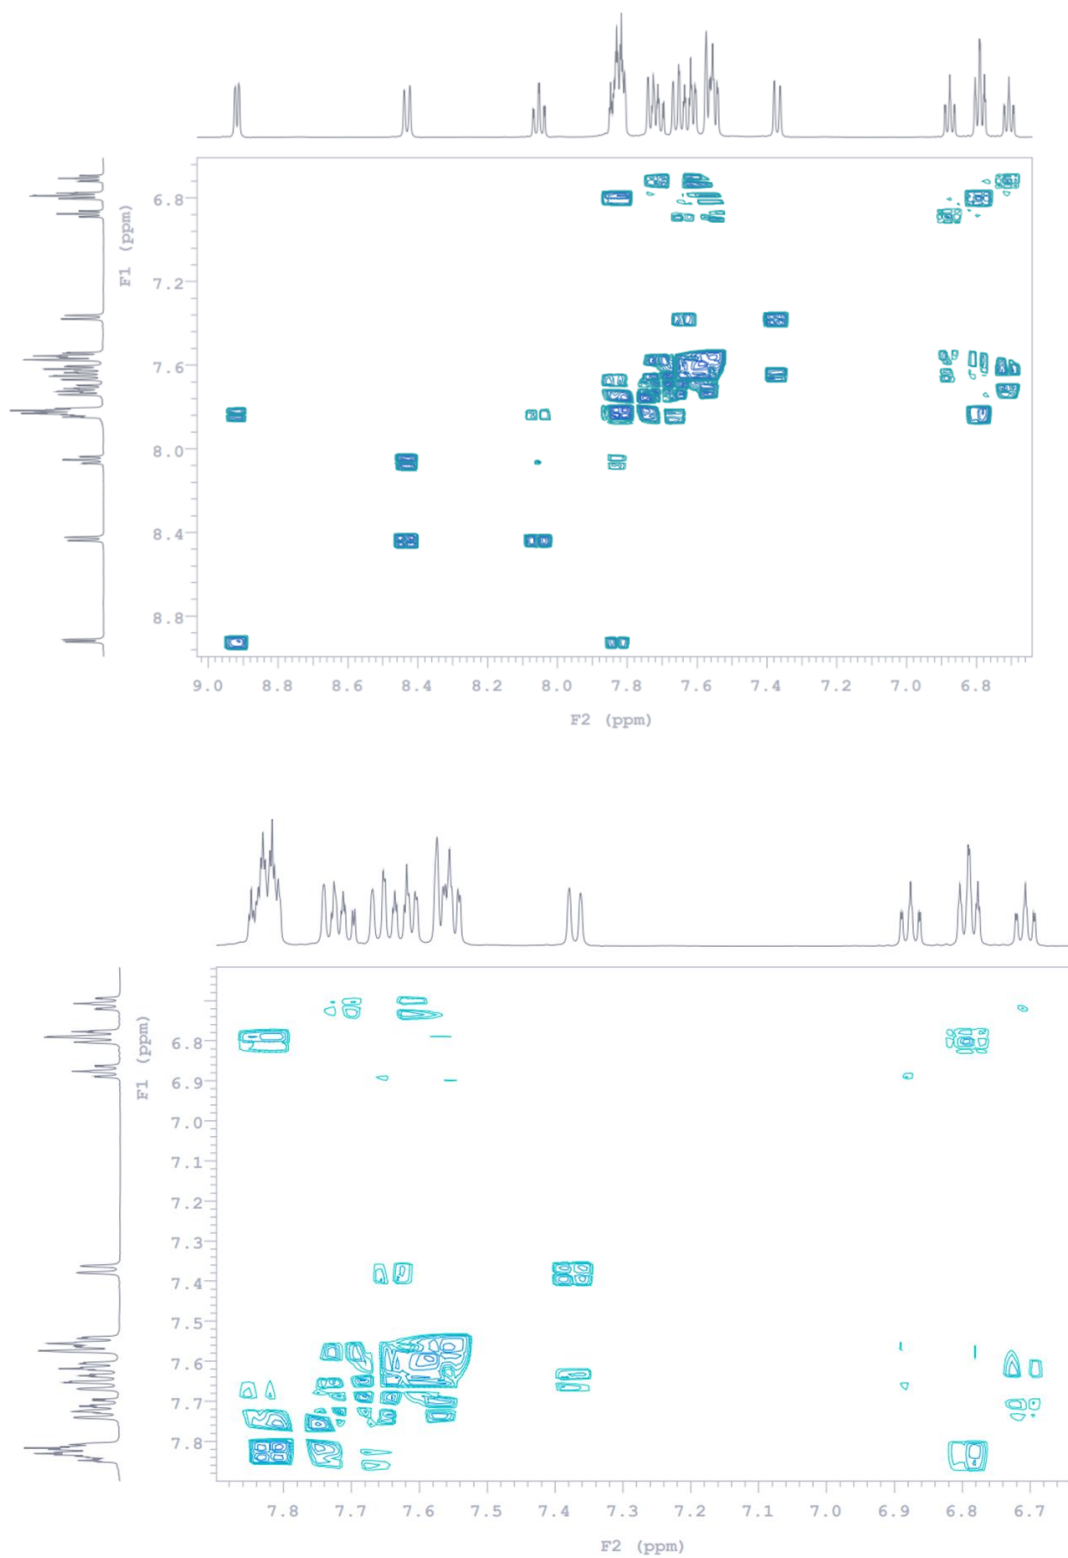

**Fig. S2.**  $^1\text{H}$ - $^1\text{H}$  COSY spectra of  $1 \cdot \text{Cl}_2 \cdot 2.5\text{H}_2\text{O}$  in  $\text{DMSO-}d_6$  (500 MHz, 298 K).

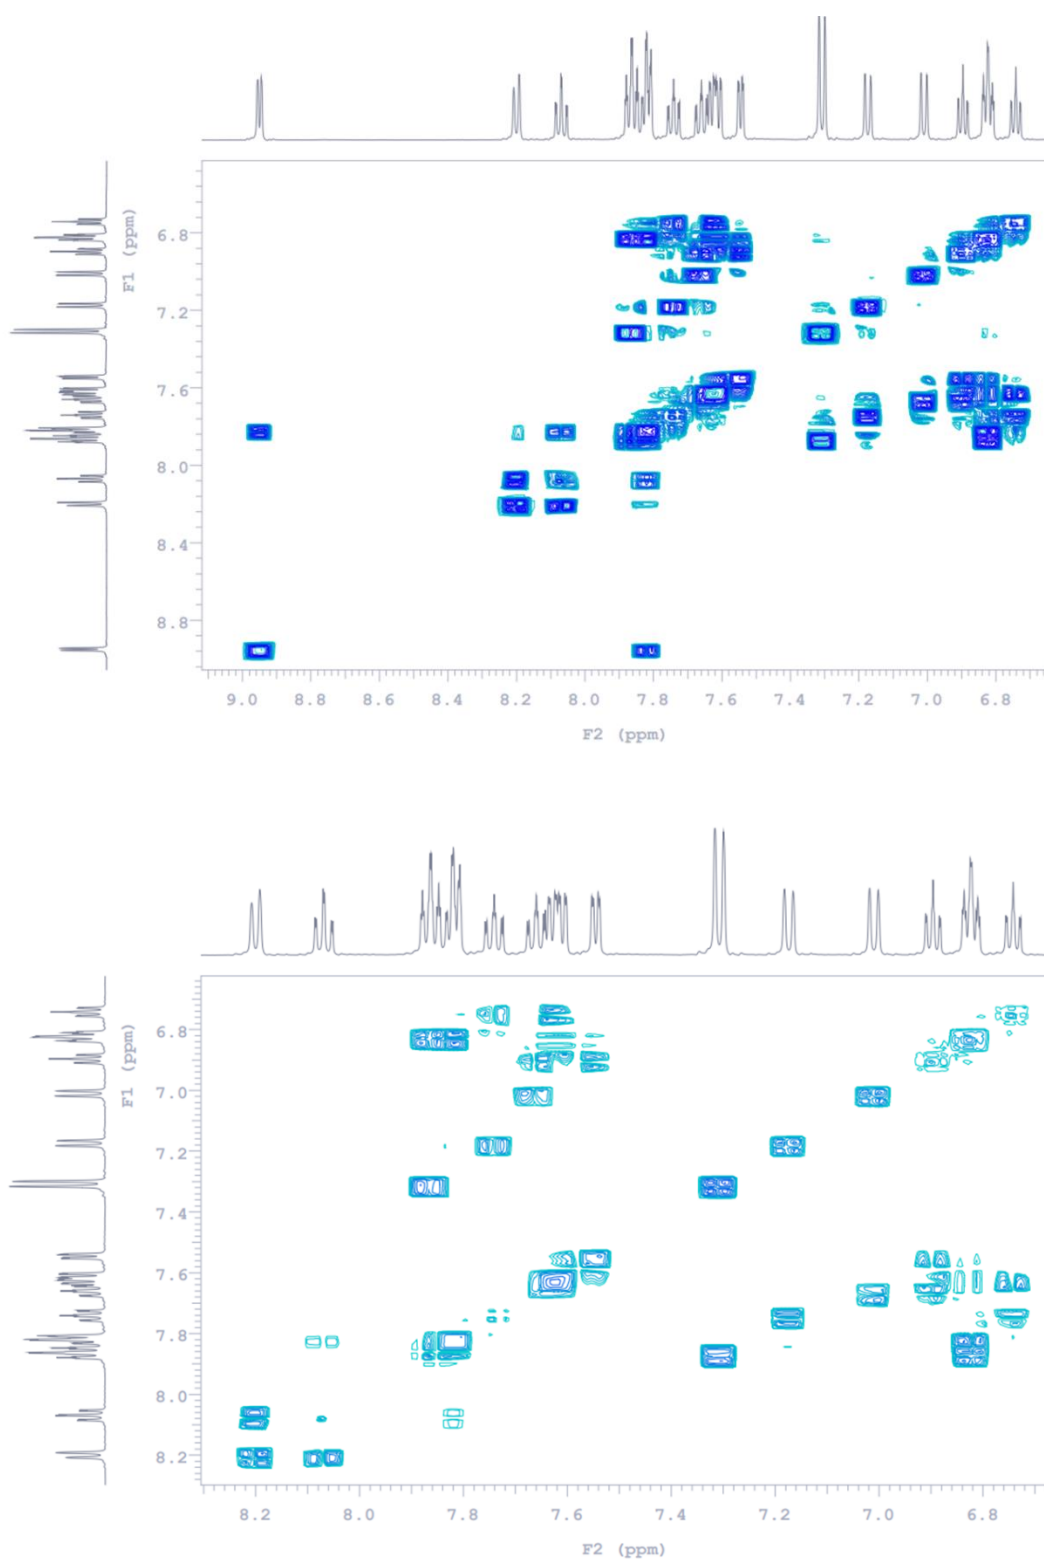

**Fig. S3.**  $^1\text{H}$ - $^1\text{H}$  COSY spectra of  $1 \cdot (\text{OTf})_2 \cdot \text{H}_2\text{O}$  in  $\text{DMSO}-d_6$  (500 MHz, 298 K).

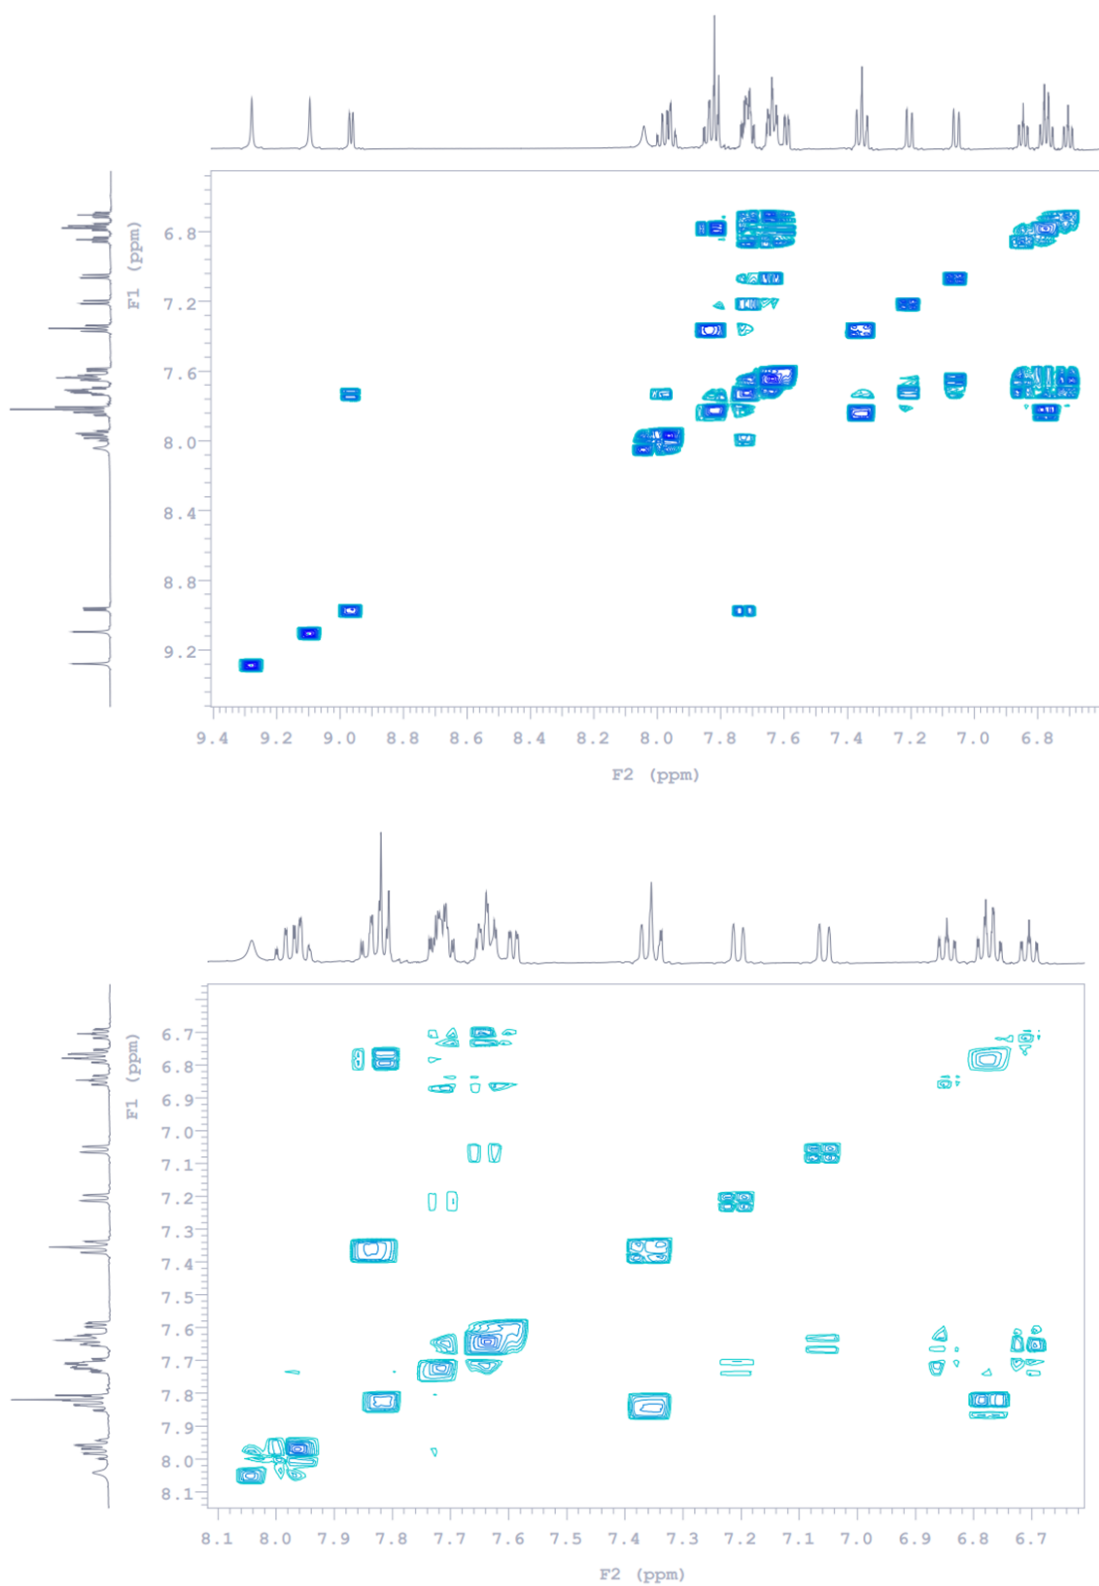

**Fig. S4.**  $^1\text{H}$ - $^1\text{H}$  COSY spectra of  $1 \cdot (\text{OTf})_2 \cdot \text{H}_2\text{O}$  in  $\text{CD}_3\text{CN}$  (500 MHz, 298 K).

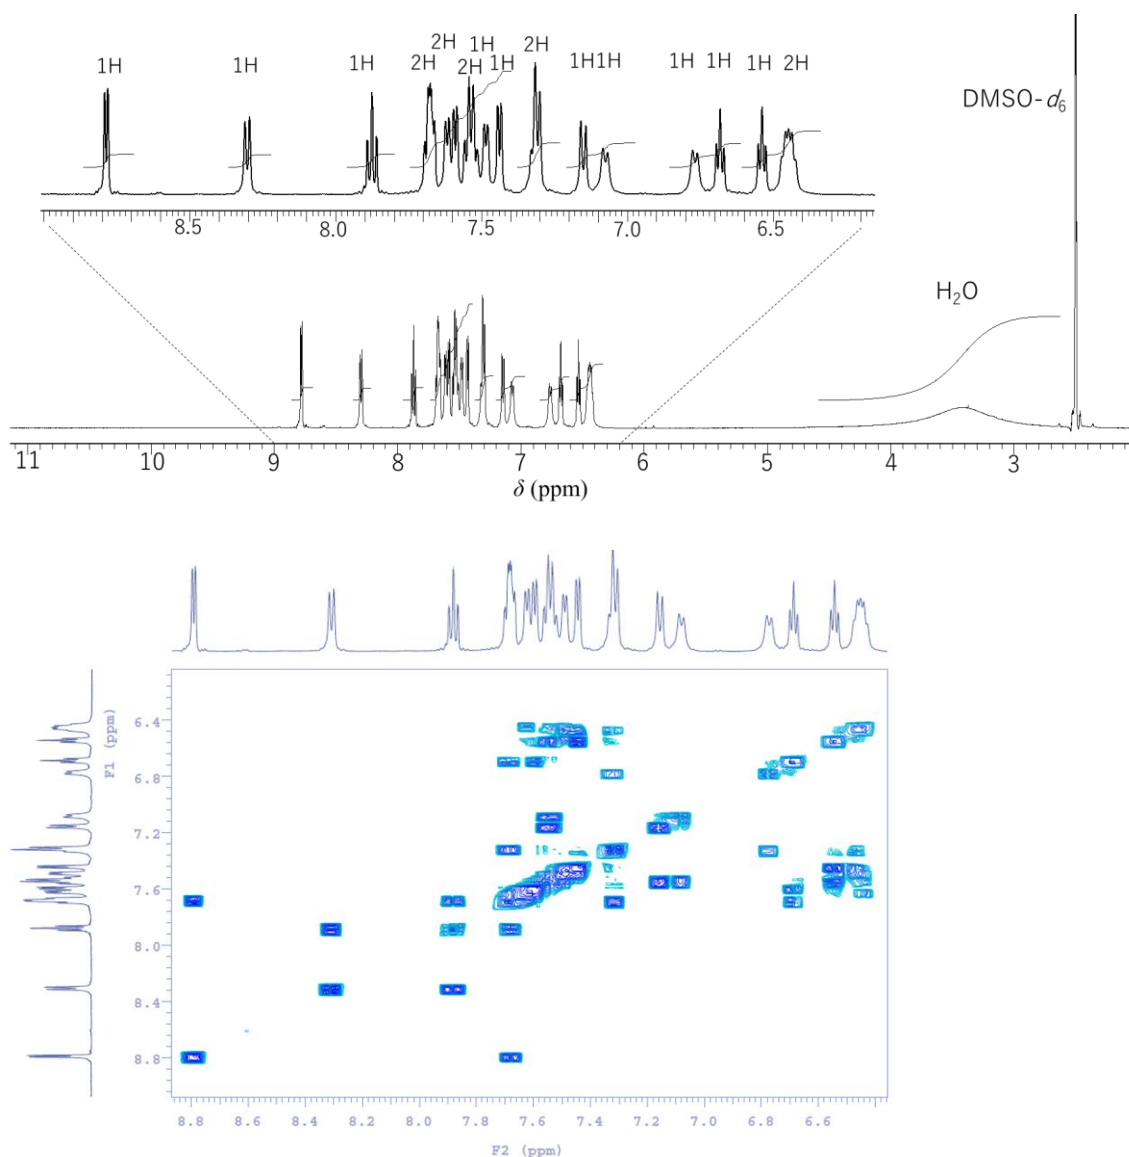

$^1\text{H}$  NMR (500 MHz  $\text{DMSO-}d_6$ ):  $\delta = 6.44$  (*m*, 2H, H-5a and H-5b), 6.53 (*dd*, 1H,  $^3J = 6.0$  and 5.0 Hz, H-5c), 6.68 (*dd*, 1H,  $^3J = 6.0$  and 7.0 Hz, H-5d), 6.76 (*d*, 1H,  $^3J = 8.0$  Hz, H-3a), 7.07 (*d*, 1H,  $^3J = 8.0$  Hz, H-3c), 7.15 (*d*, 1H,  $^3J = 8.2$  Hz, H-3b), 7.30 (*d*, 1H,  $^3J = 8.0$  Hz, H-3d), 7.31 (*dd*, 1H,  $^3J = 6.0$  and 8.0 Hz, H-4a), 7.43 (*d*, 1H,  $^3J = 5.9$  Hz, H-6c), 7.48 (*d*, 1H,  $^3J = 5.7$  Hz, H-6b), 7.53 (*m*, 2H, H-4b and H-4c), 7.59 (*d*, 1H,  $^3J = 6.0$  Hz, H-6a), 7.61 (*d*, 1H,  $^3J = 6.0$  Hz, H-6d), 7.67 (*m*, 2H, H-4d and H-5e), 7.87 (*dd*, 1H,  $^3J = 7.7$  and 7.9 Hz, H-4e), 8.30 (*d*, 1H,  $^3J = 7.7$  Hz, H-3e), 8.78 (*d*, 1H,  $^3J = 5.0$  Hz, H-6e).

**Fig. S5.**  $^1\text{H}$  NMR and  $^1\text{H-}^1\text{H}$  COSY spectra of  $1 \cdot \text{F}_2 \cdot 4\text{H}_2\text{O}$  in  $\text{DMSO-}d_6$  (500 MHz, 298 K).

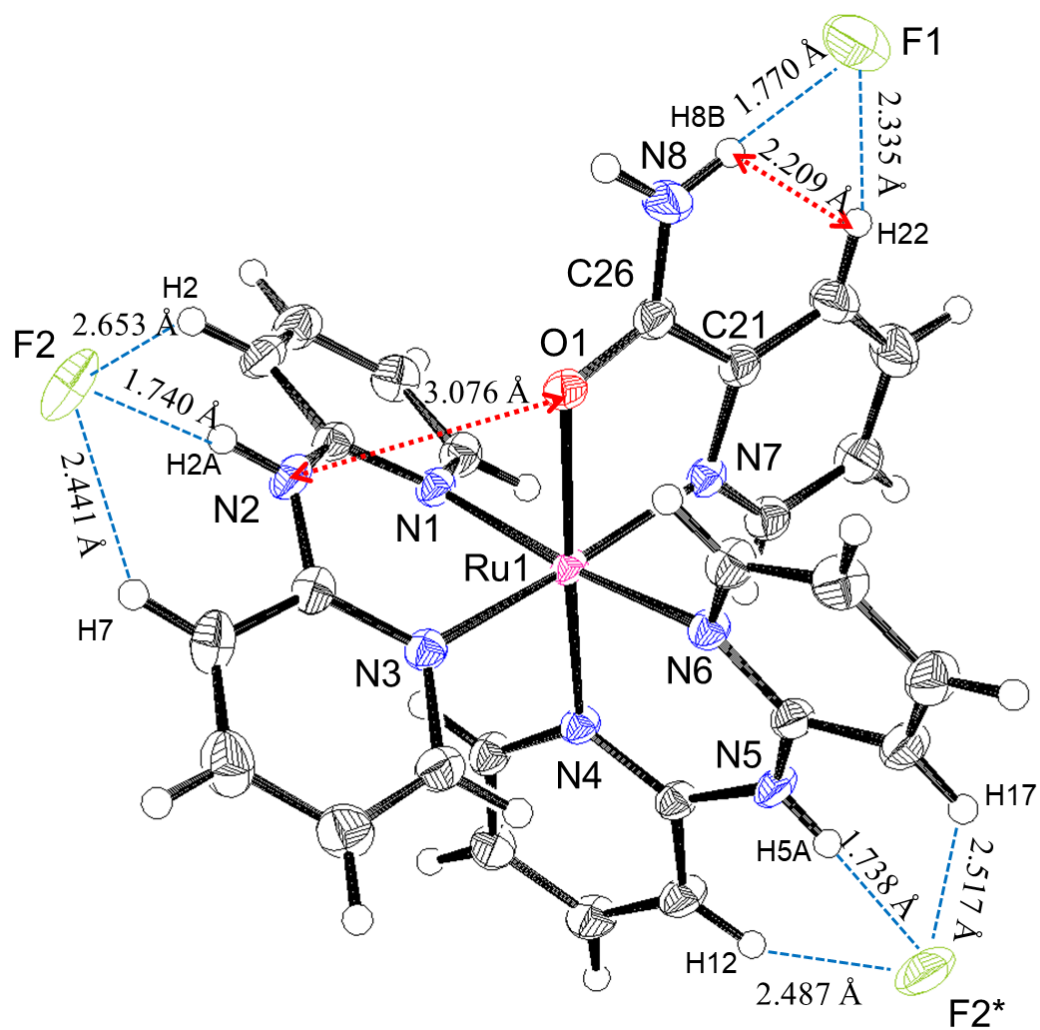

**Fig. S6.** ORTER drawing of 1·F<sub>2</sub> in 1·F<sub>2</sub>·2EtOH. Ellipsoid are drawn at 50% probability level. Two ethanol molecules have been omitted for clarity. [(\*) 1+x, 1.5-y, 1/2+z]

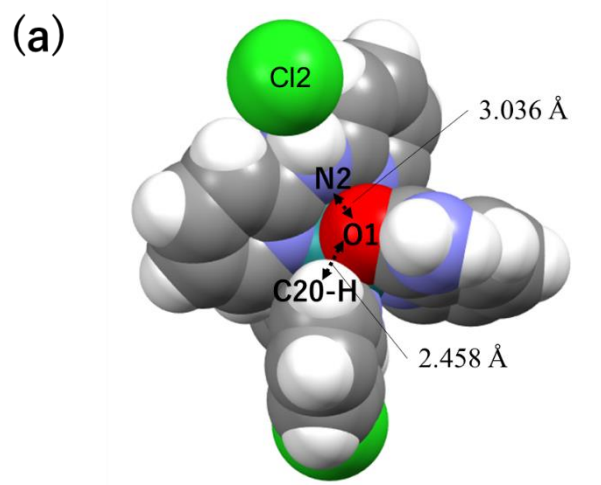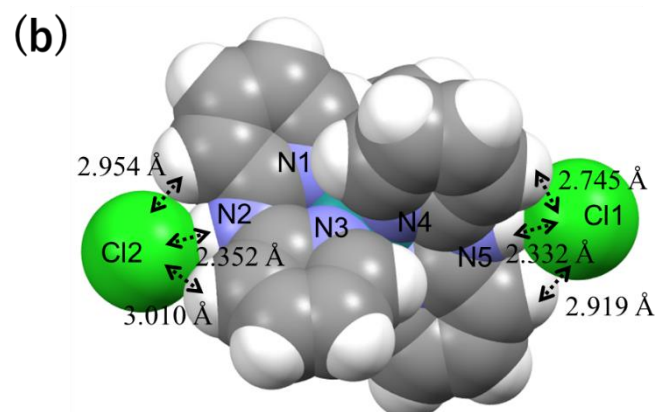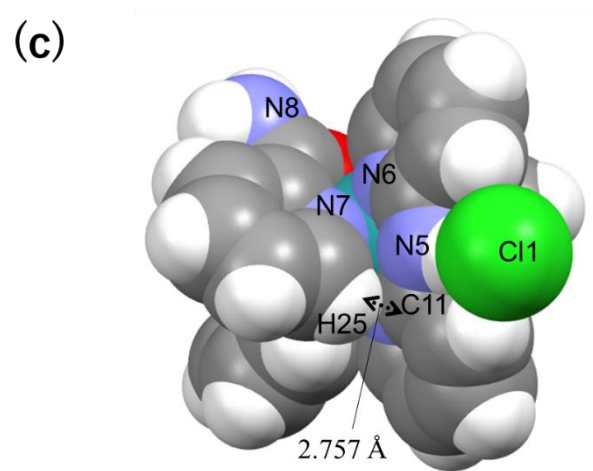

**Fig. S7.** Space Filling models of  $1 \cdot \text{Cl}_2$ .

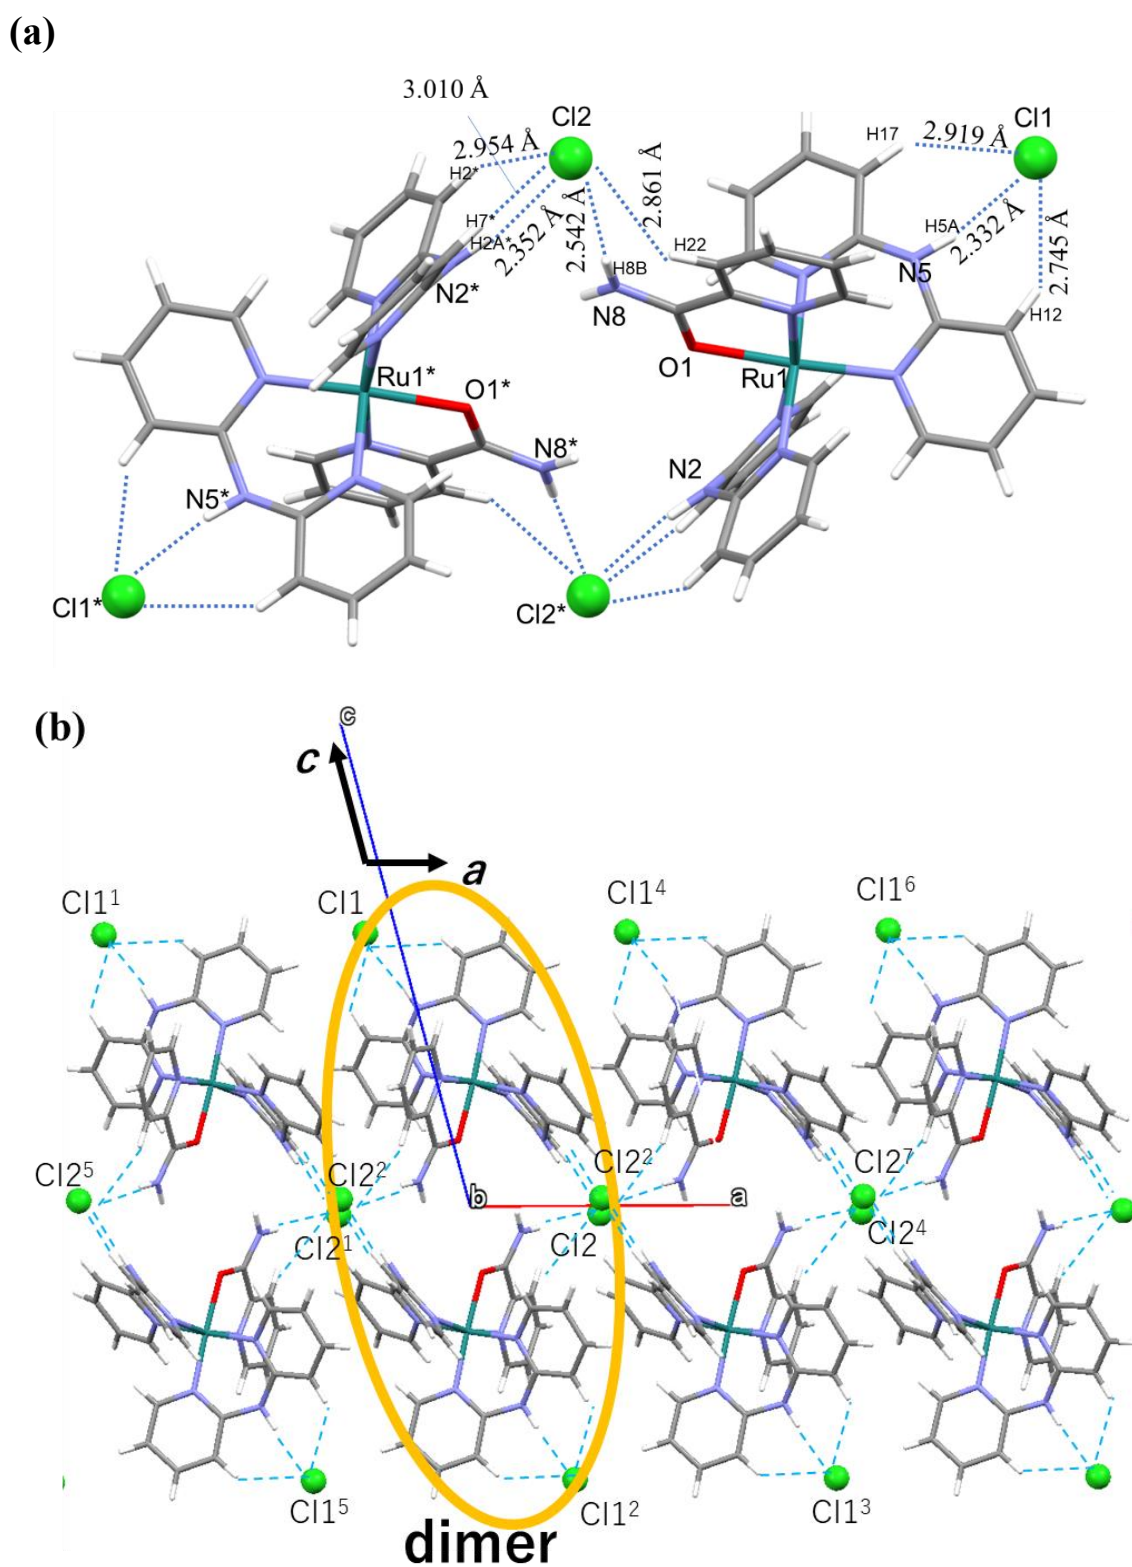

**Fig. S8.** 1D chain of dimer in crystal of  $1 \cdot \text{Cl}_2$ . (a) dimer unit and (b) 1D chain of dimer. [(\*)  $-x, -y, -z$ , (1)  $-1+x, y, z$ , (2)  $-x, -y, -z$ , (3)  $1-x, -y, -z$ , (4)  $1+x, y, z$ , (5)  $-1-x, -y, -z$ , (6)  $2+x, -y, -z$ , (7)  $2-x, -y, -x$ ]



(a)

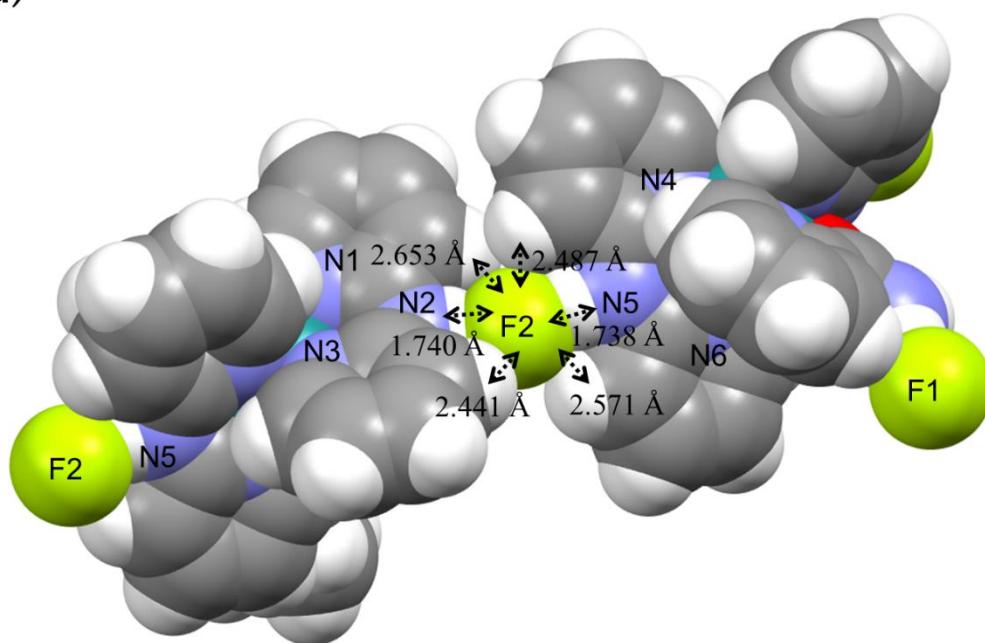

(b)

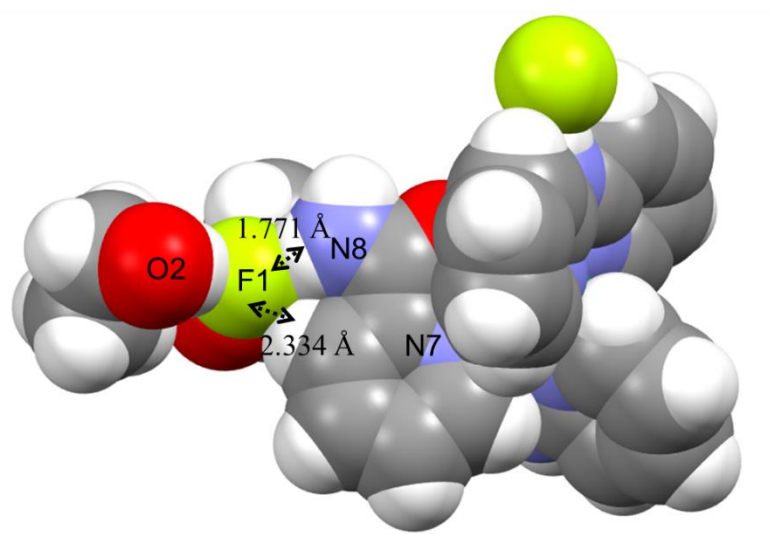

**Fig. S9.** Space Filling models of 1·F<sub>2</sub>·2EtOH.

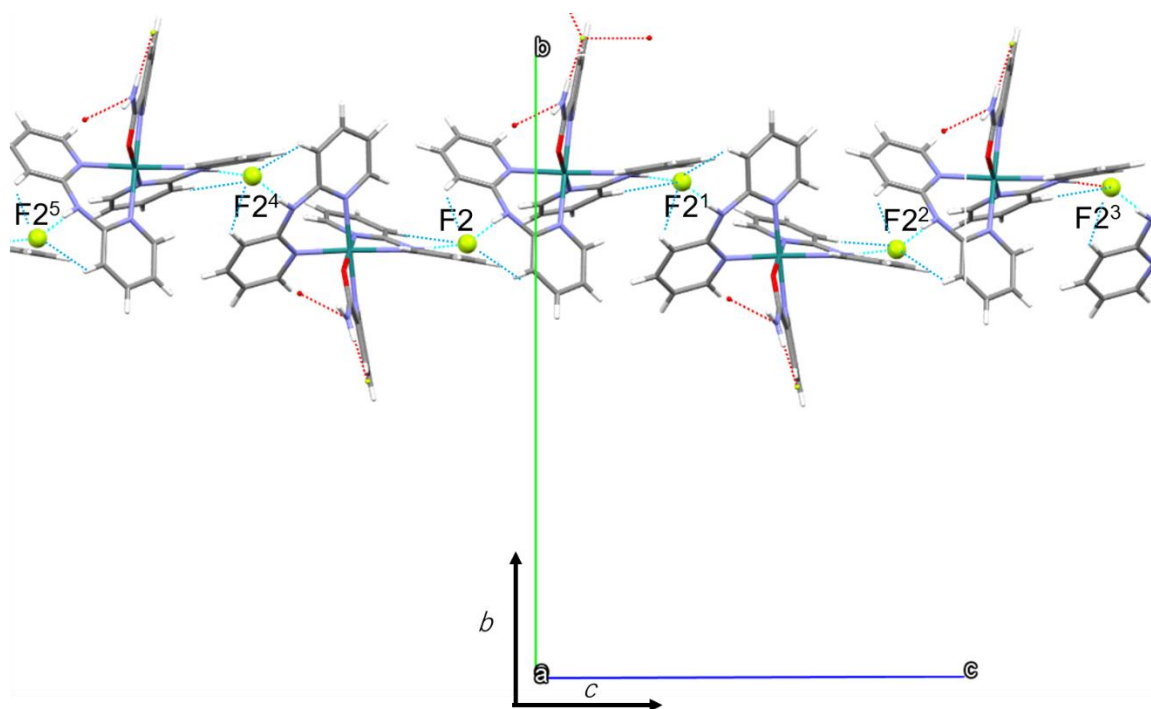

**Fig. S10.** 1D chain in crystal of  $1 \cdot F_2 \cdot 2EtOH$ . [(1)  $1+x, 1.5-y, 1/2+z$ , (2)  $2+x, y, 1+z$ , (3)  $3+x, 1.5-y, 1.5+y$ , (4)  $-1+x, 1.5-y, 1/2+z$ , (5)  $-1+x, y, -1+z$ ]

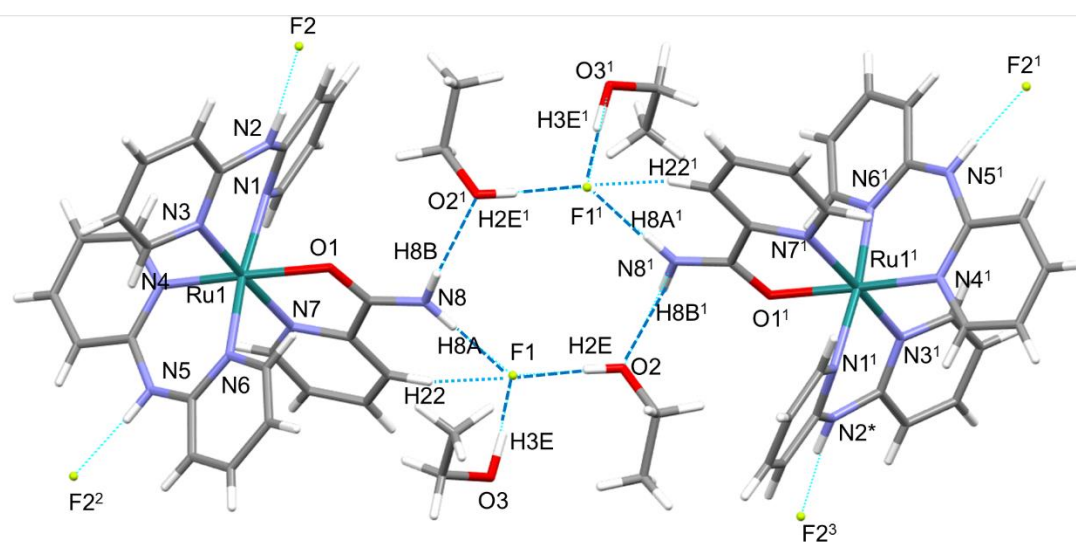

**Fig. S11.** Hydrogen bonding interaction between two amide group on two cationic complexes in crystal of  $1 \cdot F_2 \cdot 2EtOH$ .

[(1)  $-x, 2-y, -z$ , (2)  $1+x, 1.5-y, 1/2+z$ , (3)  $-x, 2-y, -z$ ]

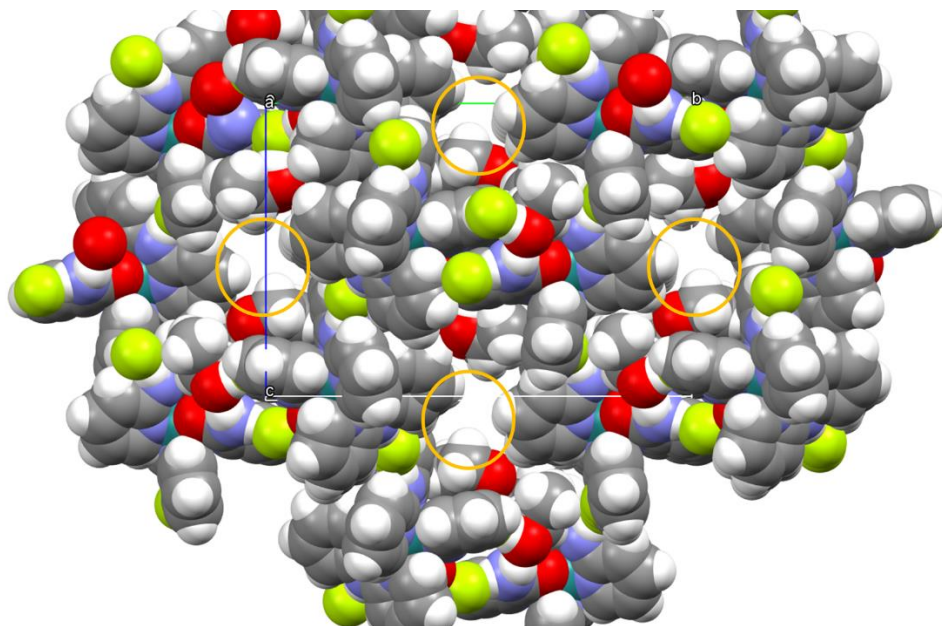

**Fig. S12.** Voids of crystal of  $1 \cdot F_2 \cdot 2EtOH$ .

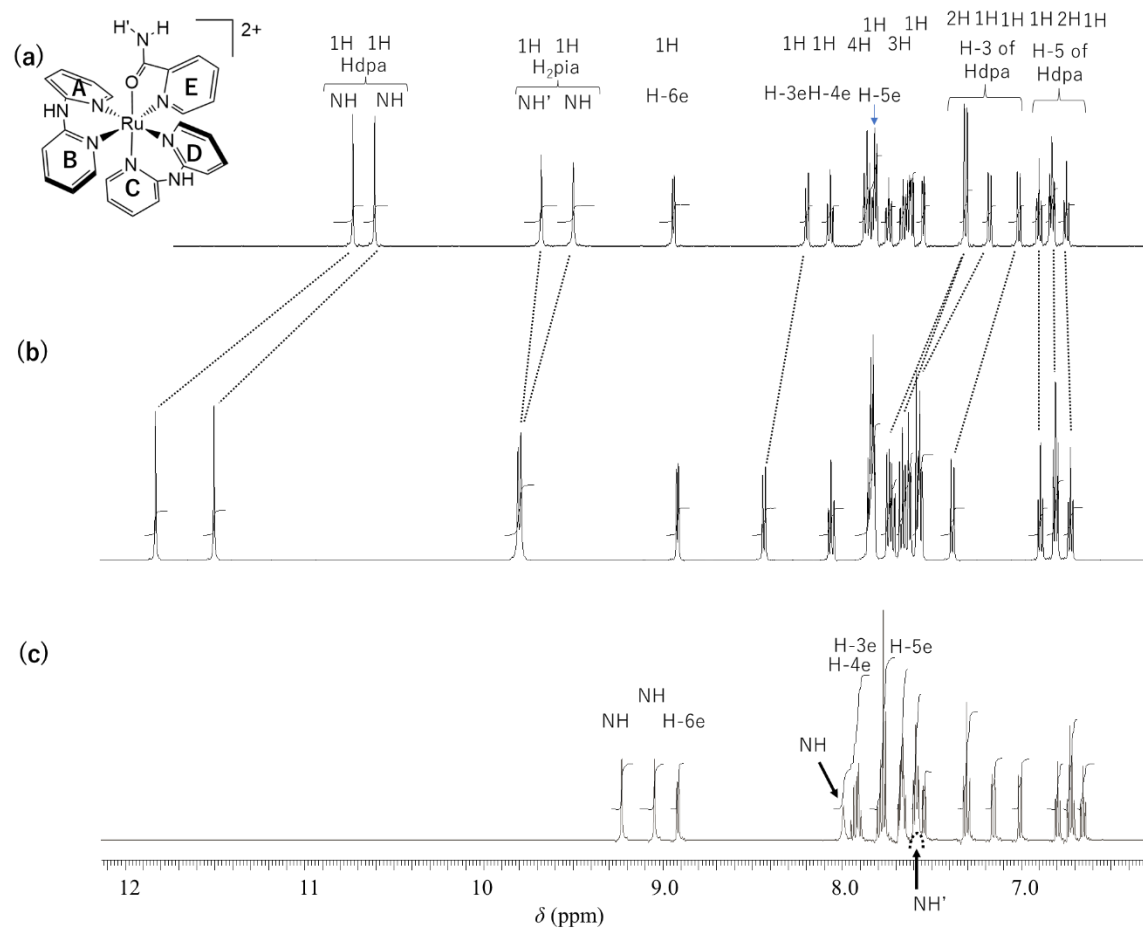

**Fig. S13.**  $^1\text{H}$  NMR spectra (500 MHz, 298 K) of (a) **1**·(OTf) $_2$ ·H $_2$ O in DMSO- $d_6$ , (b) **1**·Cl $_2$ ·2.5H $_2$ O in DMSO- $d_6$ , and (c) **1**·(OTf) $_2$ ·H $_2$ O in CD $_3$ CN.

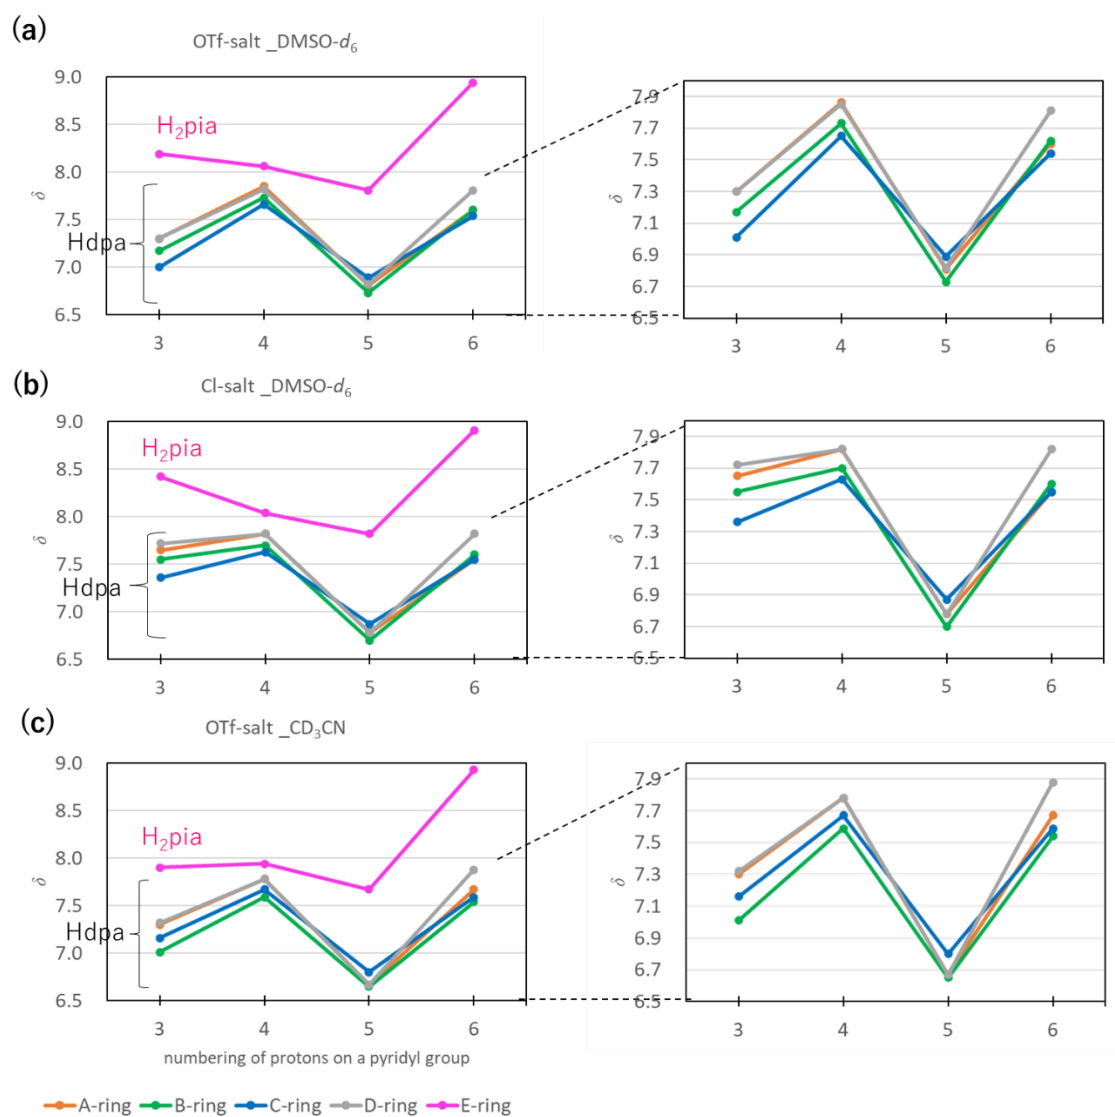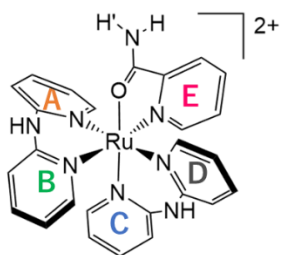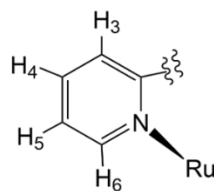

**Fig. S14.** Plots of the  $^1\text{H}$  NMR chemical shifts of (a)  $\mathbf{1} \cdot (\text{OTf})_2 \cdot \text{H}_2\text{O}$  in  $\text{DMSO-}d_6$ , (b)  $\mathbf{1} \cdot \text{Cl}_2 \cdot 2.5\text{H}_2\text{O}$  in  $\text{DMSO-}d_6$ , and (c)  $\mathbf{1} \cdot (\text{OTf})_2 \cdot \text{H}_2\text{O}$  in  $\text{CD}_3\text{CN}$ .

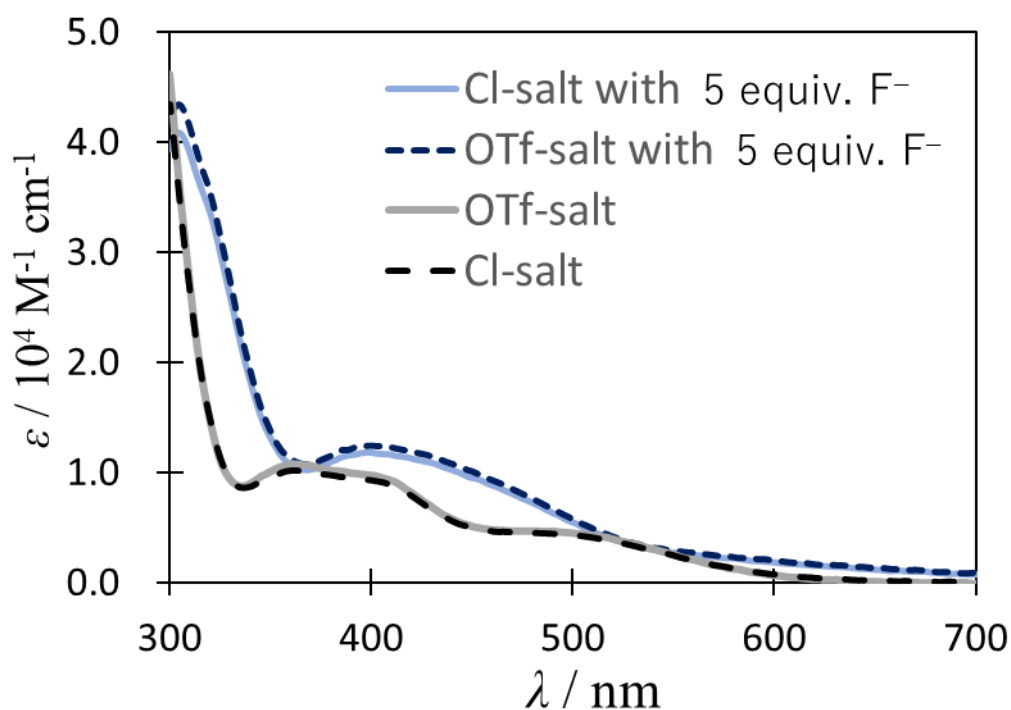

**Fig. S15.** Absorption spectra of  $1 \cdot (\text{OTf})_2 \cdot \text{H}_2\text{O}$  (black bot line),  $1 \cdot \text{Cl}_2 \cdot 2.5\text{H}_2\text{O}$  (gray line),  $1 \cdot (\text{OTf})_2 \cdot \text{H}_2\text{O}$  with 5 equivalents of  $\text{F}^-$  anions (blue bot line), and  $1 \cdot \text{Cl}_2 \cdot 2.5\text{H}_2\text{O}$  with 5 equivalents of  $\text{F}^-$  anions (pale blue line) in DMSO ( $2.0 \times 10^{-5} \text{ M}$ ).

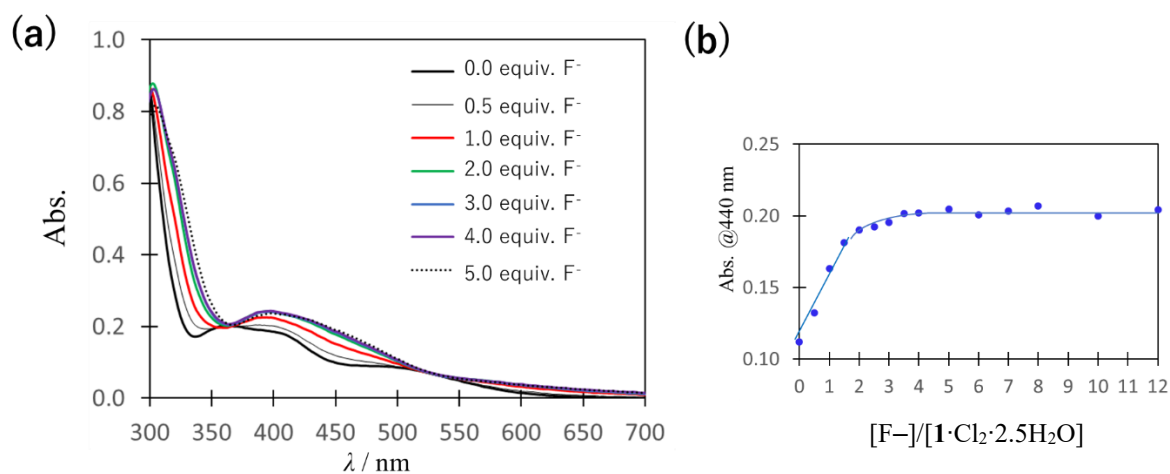

**Fig. S16.** (a) Family of absorption spectra taken over the course of the titration of a  $2.0 \times 10^{-5} \text{ M}$  DMSO solution of  $1 \cdot \text{Cl}_2 \cdot 2.5\text{H}_2\text{O}$  with a standard solution of TBAF. (b) Titration profiles at 440 nm.

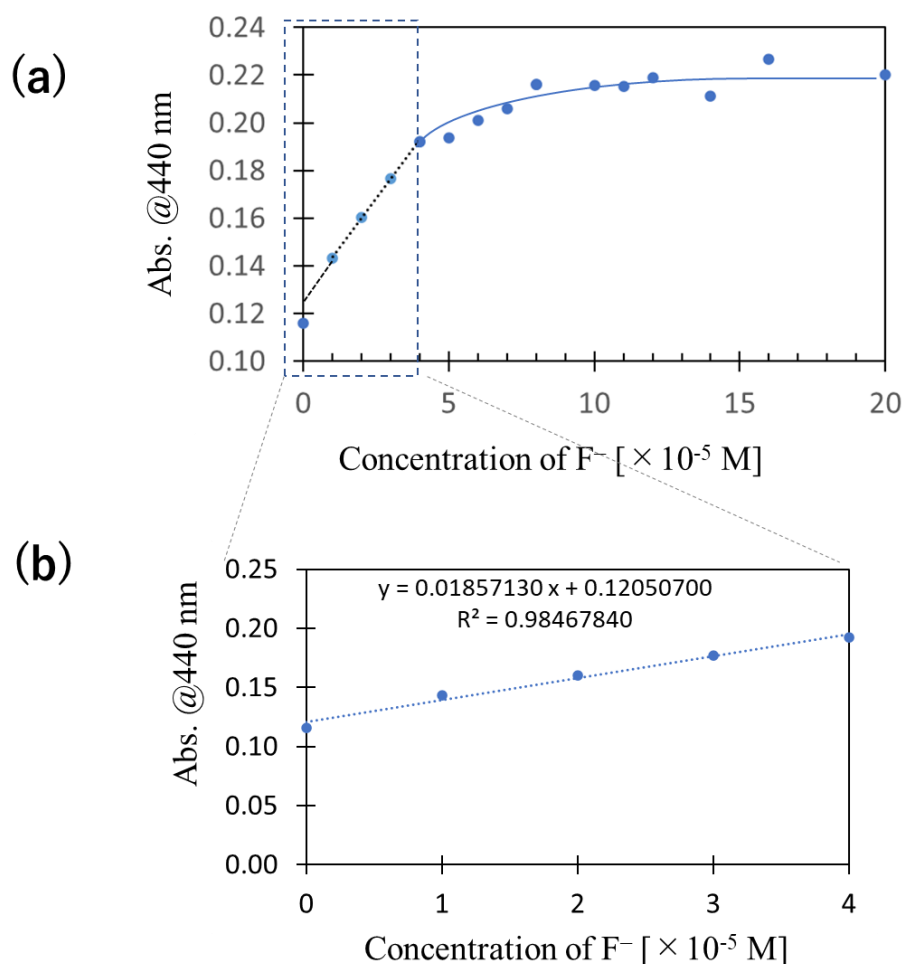

**Fig. S17.** Titration plot of absorbance of 1·(OTf)<sub>2</sub>·H<sub>2</sub>O in DMSO (2.0 × 10<sup>-5</sup> M) at 440 nm vs. concentration of F<sup>-</sup> anion.

The limit of detection (LOD) was determined from the following equation:  $LOD = (3 \times \sigma) / \text{slope}$ , where  $\sigma = \{ \sum (y_i - \bar{y}_i)^2 / (n - 2) \}^{1/2}$  and 3 is the factor at the 99% confidence level. [rel. 41,42] From the graph ( $x = 0 \sim 2.0 \times 10^{-5}$  M), we get slope = (0.01857 / 10<sup>-5</sup>),  $n = 5$ , and  $\sigma = 0.04229$ . Thus using the formula we get the LOD = 0.68 × 10<sup>-5</sup>.

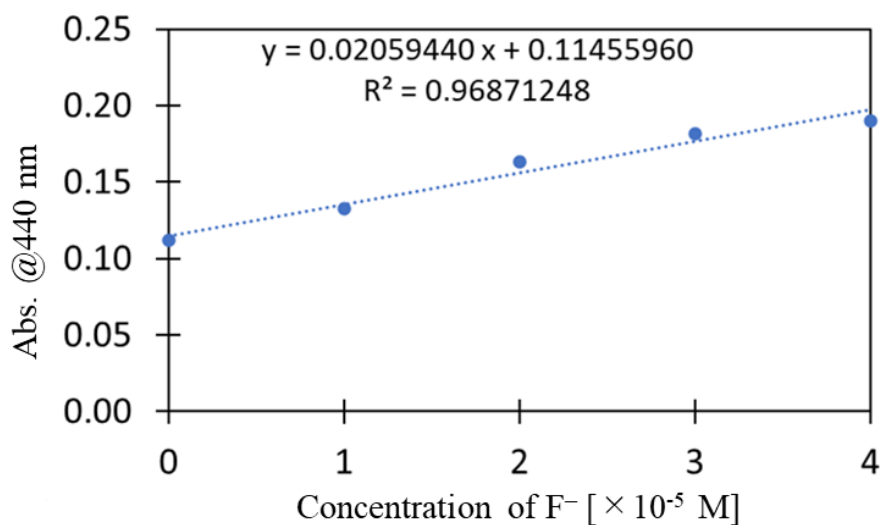

**Fig. S18.** Titration plot of absorbance of  $1 \cdot \text{Cl}_2 \cdot 2.5\text{H}_2\text{O}$  in DMSO ( $2.0 \times 10^{-5}$  M) at 440 nm vs. concentration of  $\text{F}^-$  anion.

The limit of detection (LOD) was determined from the following equation:  $\text{LOD} = (3 \times \sigma) / \text{slope}$ , where  $\sigma = \{\sum (y_i - \hat{y}_i)^2 / (n - 2)\}^{1/2}$  and 3 is the factor at the 99% confidence level. [ref. 41,42] From the graph ( $x = 0 \sim 2.0 \times 10^{-5}$  M), we get slope =  $(0.02059 / 10^{-5})$ ,  $n = 5$ , and  $\sigma = 0.06128$ . Thus using the formula we get the  $\text{LOD} = 0.89 \times 10^{-5}$ .

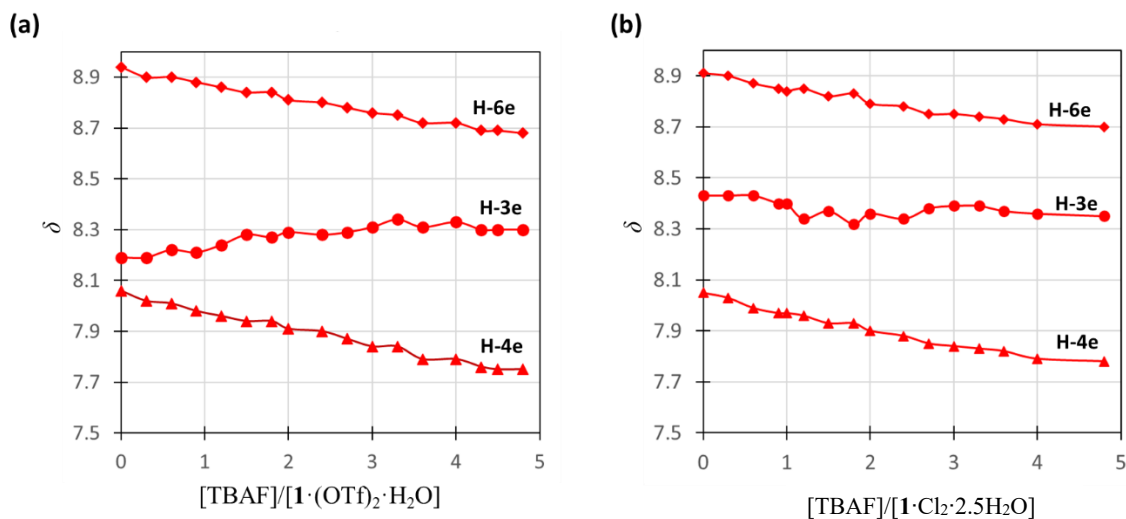

**Fig. S19.** Titration profiles; chemical shifts of H-3e, H-4e, and H-6e signals of  $\text{H}_2\text{pia}$  ligands in  $1 \cdot (\text{OTf})_2 \cdot \text{H}_2\text{O}$  or  $1 \cdot \text{Cl}_2 \cdot 2.5\text{H}_2\text{O}$  in  $\text{DMSO}-d_6$  vs  $[\text{TBAF}]/[1 \cdot (\text{OTf})_2 \cdot \text{H}_2\text{O}]$  or  $[\text{TBAF}]/[1 \cdot \text{Cl}_2 \cdot 2.5\text{H}_2\text{O}]$ , respectively.



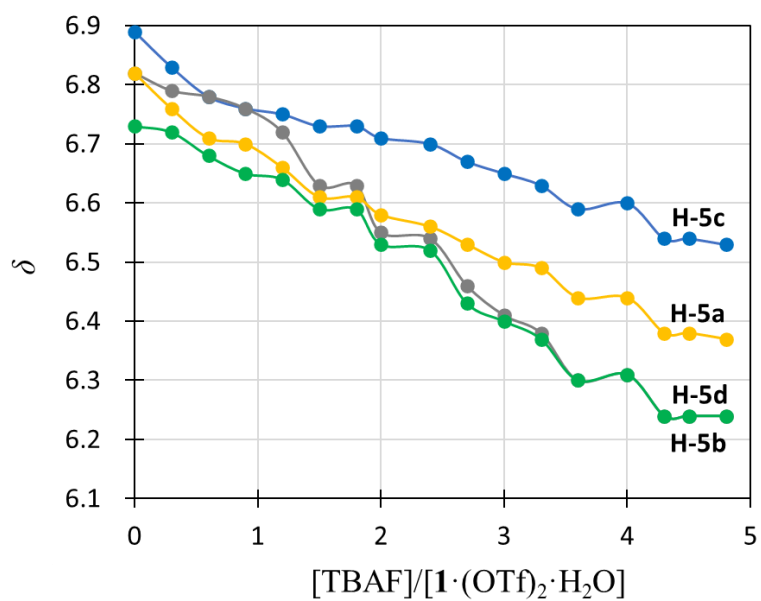

**Fig. S20.** Titration profiles; chemical shifts of H-5 signals of Hdpa ligands in  $1 \cdot (\text{OTf})_2 \cdot \text{H}_2\text{O}$  in  $\text{DMSO-}d_6$  vs  $[\text{TBAF}]/[1 \cdot (\text{OTf})_2 \cdot \text{H}_2\text{O}]$ .

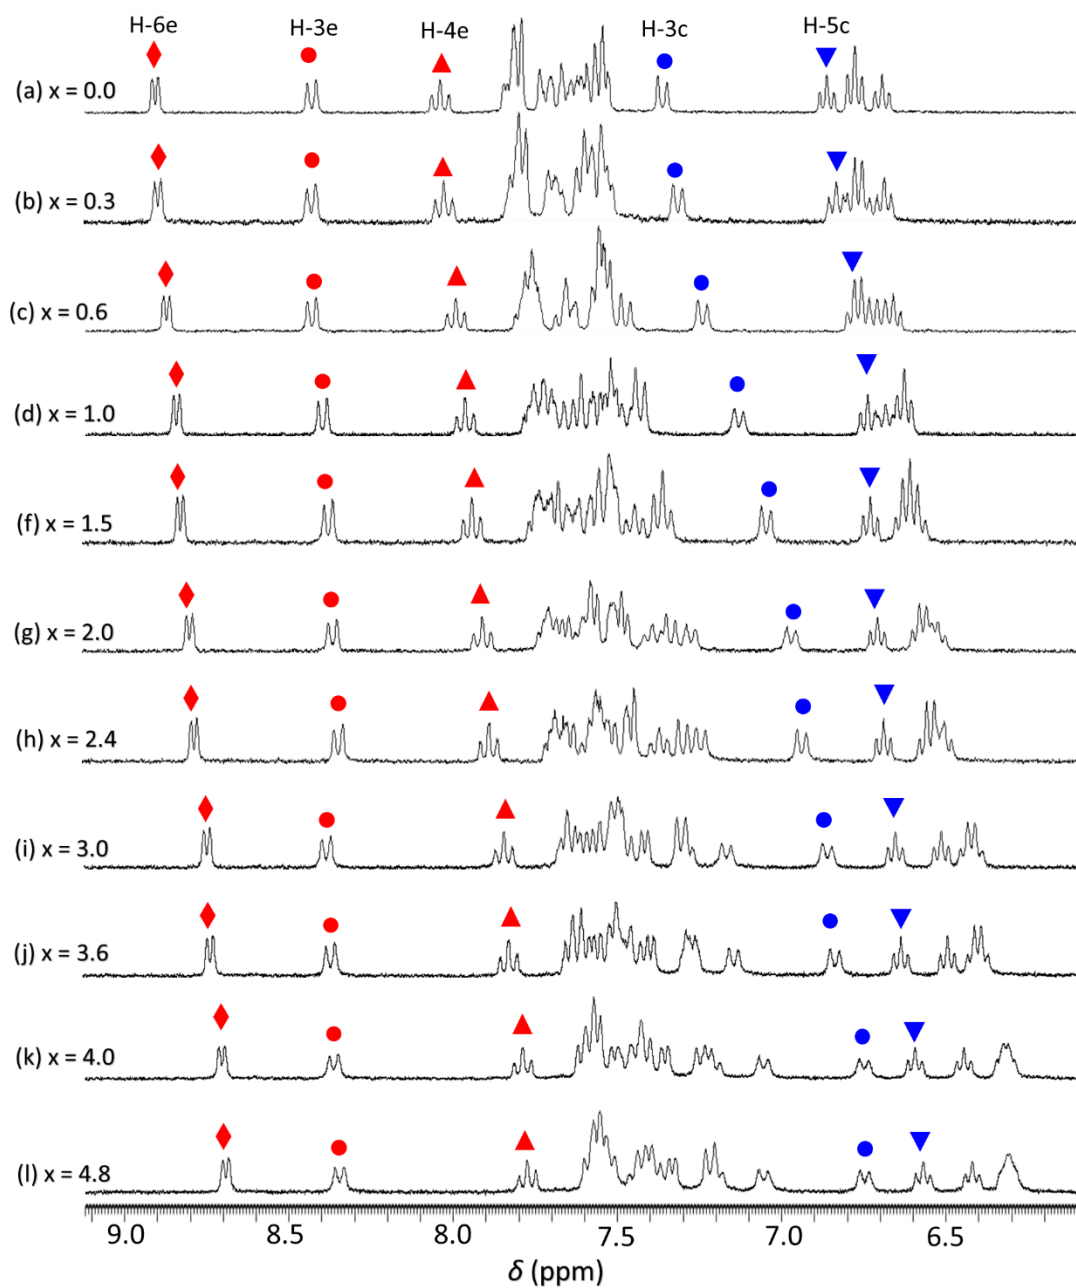

**Fig. S21.**  $^1\text{H}$  NMR spectra taken over the course of a  $\text{DMSO-}d_6$  solution of  $1 \cdot \text{Cl}_2 \cdot 2.5\text{H}_2\text{O}$  ( $2.2 \times 10^{-2}$  M) with TBAF.  $x = [\text{TBAF}]/[1 \cdot \text{Cl}_2 \cdot 2.5\text{H}_2\text{O}]$ . (300 MHz NMR, 298 K)

|        | $\mathbf{1}^{2+}$                                                                                | $\mathbf{1}\cdot\mathbf{F}_3^-$                                                                  |
|--------|--------------------------------------------------------------------------------------------------|--------------------------------------------------------------------------------------------------|
| LUMO+4 | 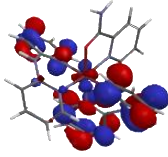<br>-6.29 eV    | <br>1.92 eV    |
| LUMO+3 | <br>-6.53 eV    | <br>1.65 eV    |
| LUMO+2 | <br>-6.58 eV    | <br>1.54 eV    |
| LUMO+1 | <br>-6.71 eV   | <br>1.49 eV   |
| LUMO   | <br>-7.62 eV  | <br>0.99 eV  |
| HOMO   | <br>-10.78 eV | <br>-2.02 eV |
| HOMO-1 | <br>-10.85 eV | <br>-2.1 eV  |
| HOMO-2 | <br>-11.16 eV | <br>-2.44 eV |

**Fig. S22.** Selected contour plots (isovalue  $0.032 \text{ e}/\text{\AA}^3$ ) of frontier orbitals and energy of  $\mathbf{1}^{2+}$  (left) and  $\mathbf{1}\cdot\mathbf{F}_3^-$  (right) involved in the lower-lying transition.
